# Supplementary material for: Toward selective, sensitive, and discriminative detection of Hg2+ and Cd2+via pH-modulated surface chemistry of glutathione-capped gold nanoclusters
Source: Royal Society of Chemistry journal article supplement (doi:10.1039/c5an01356a), 2015-01-01

## Supporting Information

### **Toward Selective, Sensitive, and Discriminative Detection of Hg<sup>2+</sup> and Cd<sup>2+</sup> via pH-Modulated Surface Chemistry of Glutathione-Capped Gold Nanoclusters**

Pengcheng Huang,\* Sha Li, Nan Gao, Fangying Wu\*

College of Chemistry, Nanchang University, Nanchang 330031, China

\*Corresponding Author. E-mails: Pengcheng Huang, pchuang@ncu.edu.cn; Fangying Wu, fywu@ncu.edu.cn.

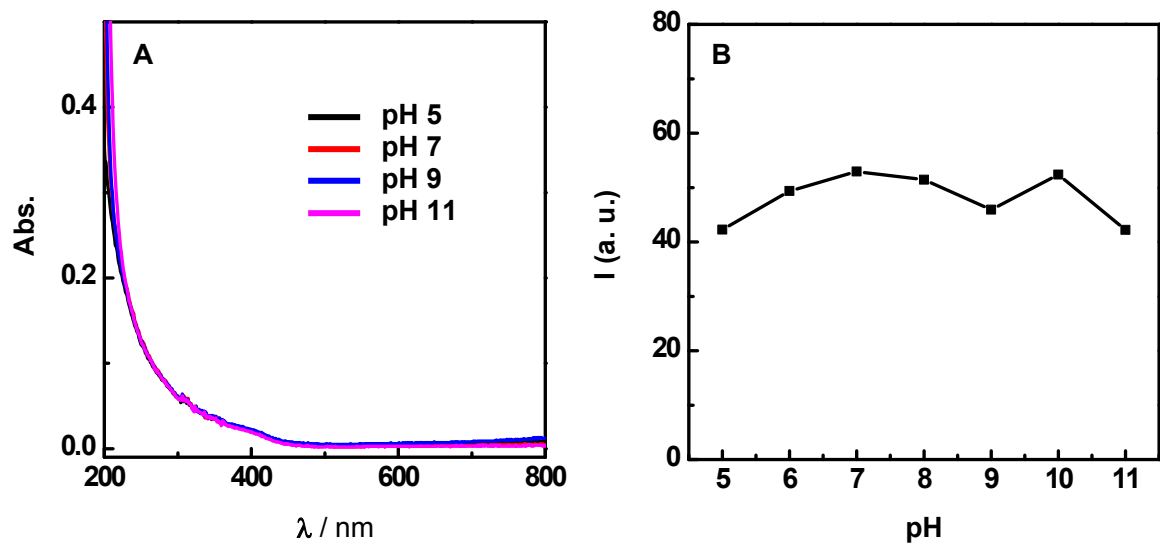

**Figure S1.** UV-vis absorption spectra (A) and the change of fluorescence intensity (B) of GSH-Au NCs under different pH values.

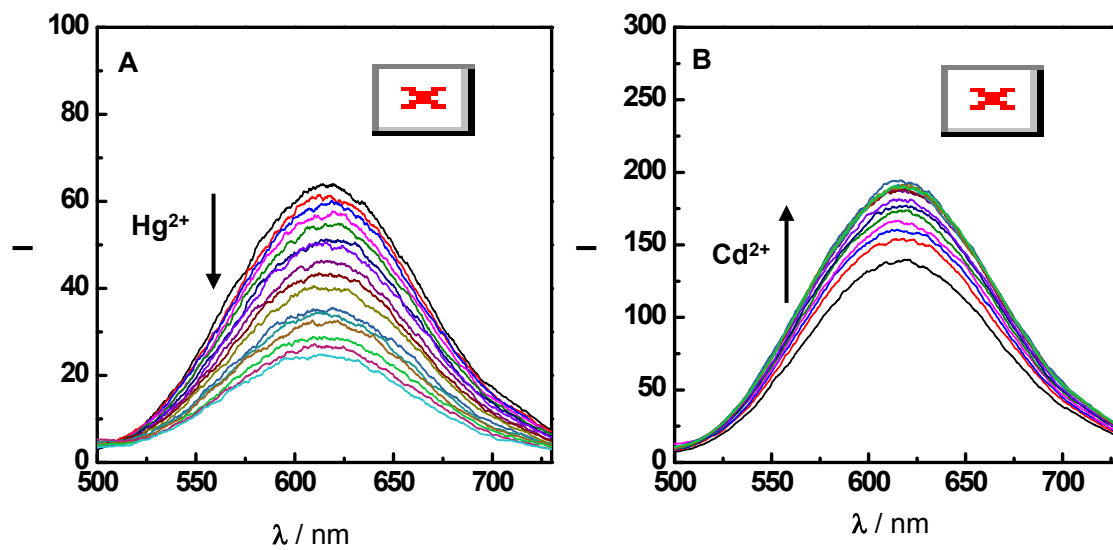

**Figure S2.** Fluorescence responses of GSH-Au NCs (A) at pH 5 in the presence of Hg<sup>2+</sup> with the various concentrations from 0 to 1.65  $\mu\text{M}$  and, (B) at pH 11 in the presence of Cd<sup>2+</sup> with the various concentrations from 0 to 1.4  $\mu\text{M}$ , respectively.

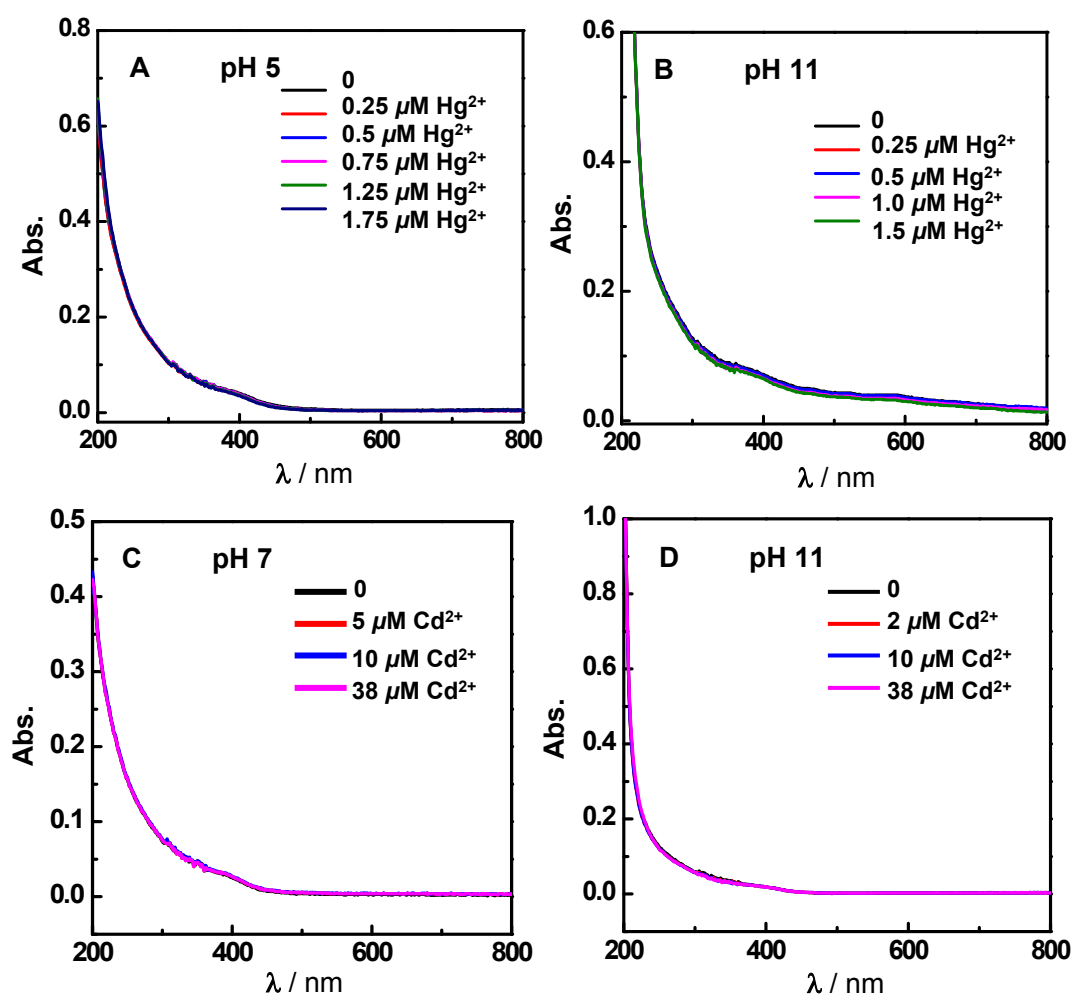

**Figure S3.** UV-vis absorption spectra of the GSH-Au NCs upon the addition of different concentrations of  $\text{Hg}^{2+}$  at pH 5 (A) and 11 (B), or  $\text{Cd}^{2+}$  at pH 7 (C) and 11 (D), respectively.

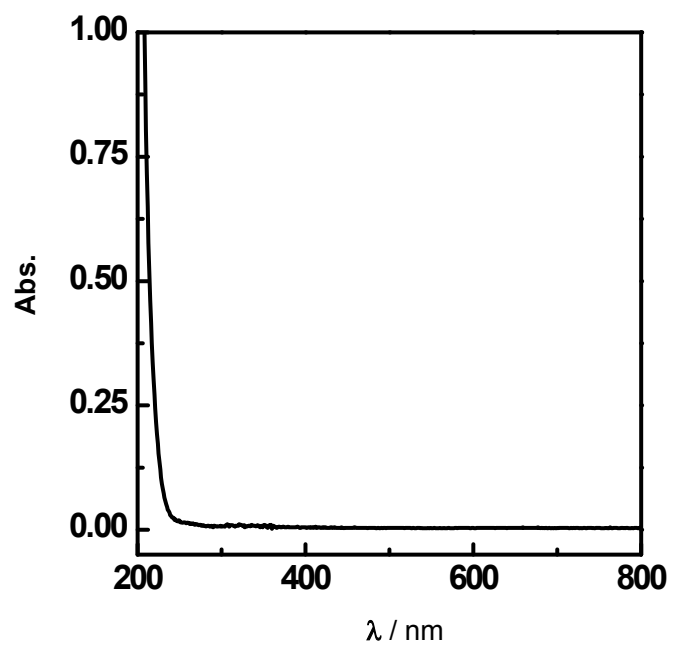

**Figure S4.** UV-vis absorption spectrum of GSH.

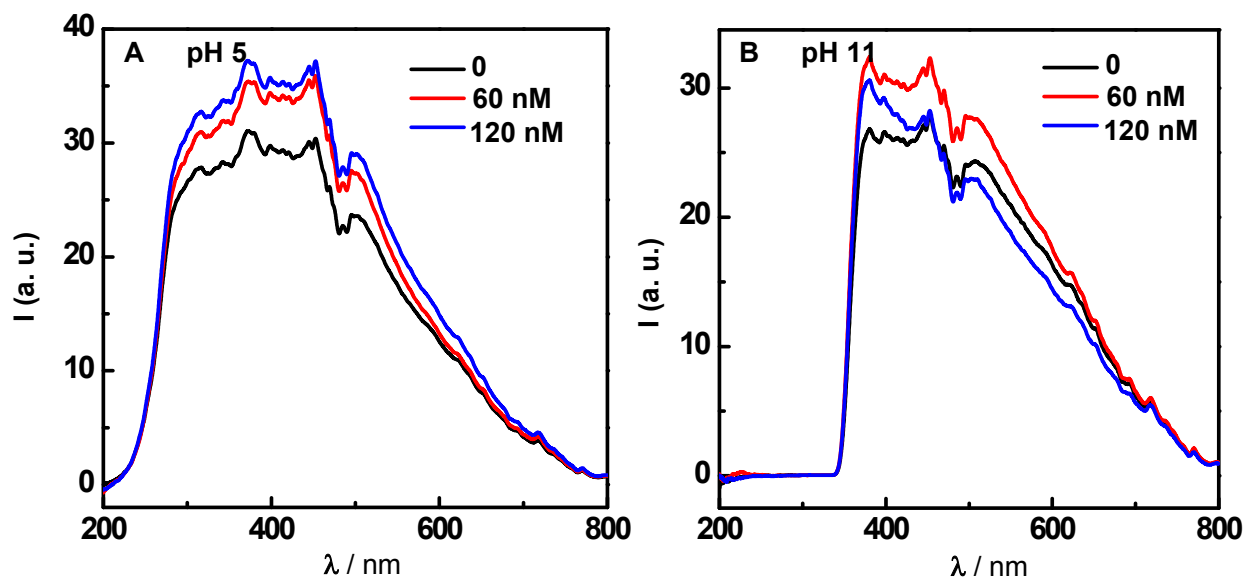

**Figure S5.** LS spectra of GSH-Au NCs at pH 5 (A) and 11 (B), respectively, upon the addition of different concentrations of  $\text{Hg}^{2+}$ .

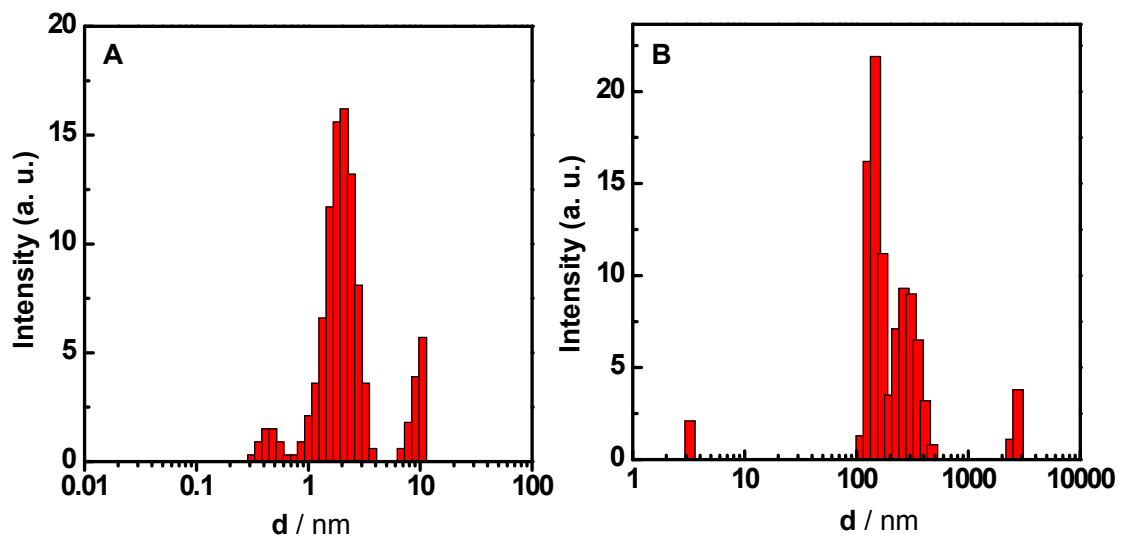

**Figure S6.** DLS measurements for GSH-Au NCs at pH 5 in the absence (A) and presence (B) of  $Hg^{2+}$ .

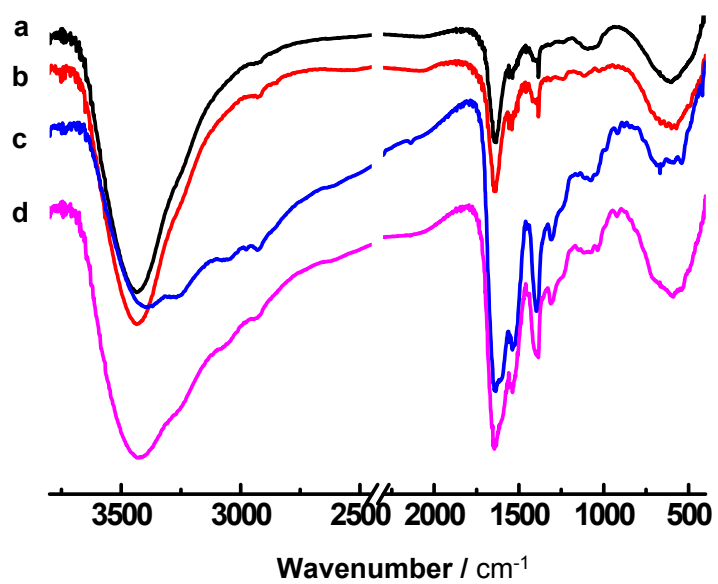

**Figure S7.** FT-IR spectra of GSH-Au NCs at pH 5 in the absence (a) and presence (b) of Hg<sup>2+</sup>, and at pH 11 in the absence (c) and presence (d) of Hg<sup>2+</sup>, respectively. Y axis is transmittance.



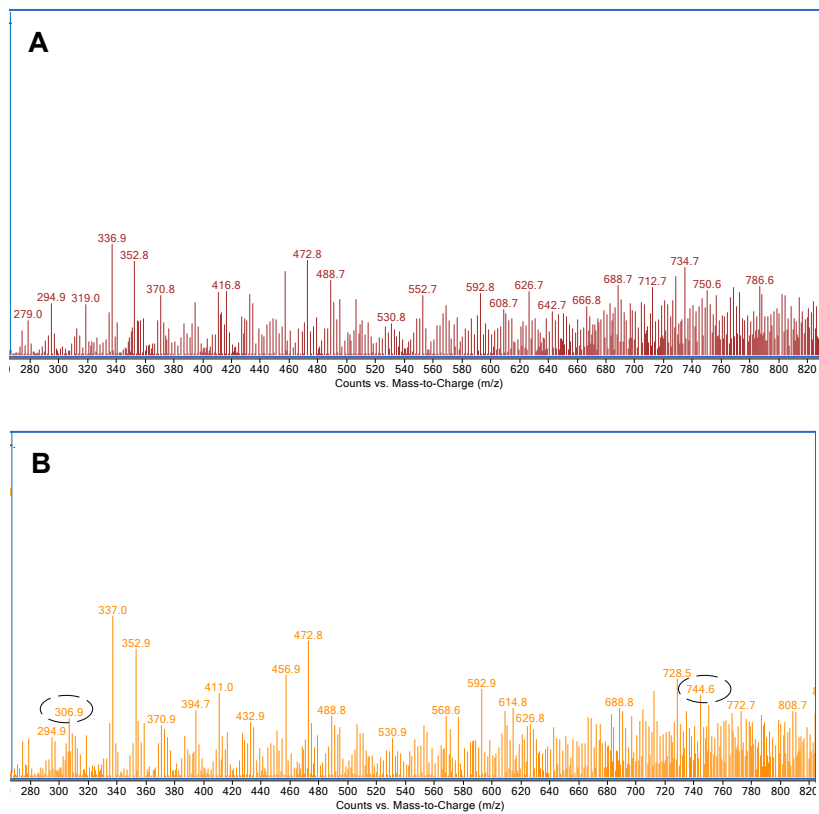

**Figure S8.** ESI-MS data for GSH-Au NCs at pH 5 in the absence (A) and presence (B) of  $\text{Hg}^{2+}$ , respectively.

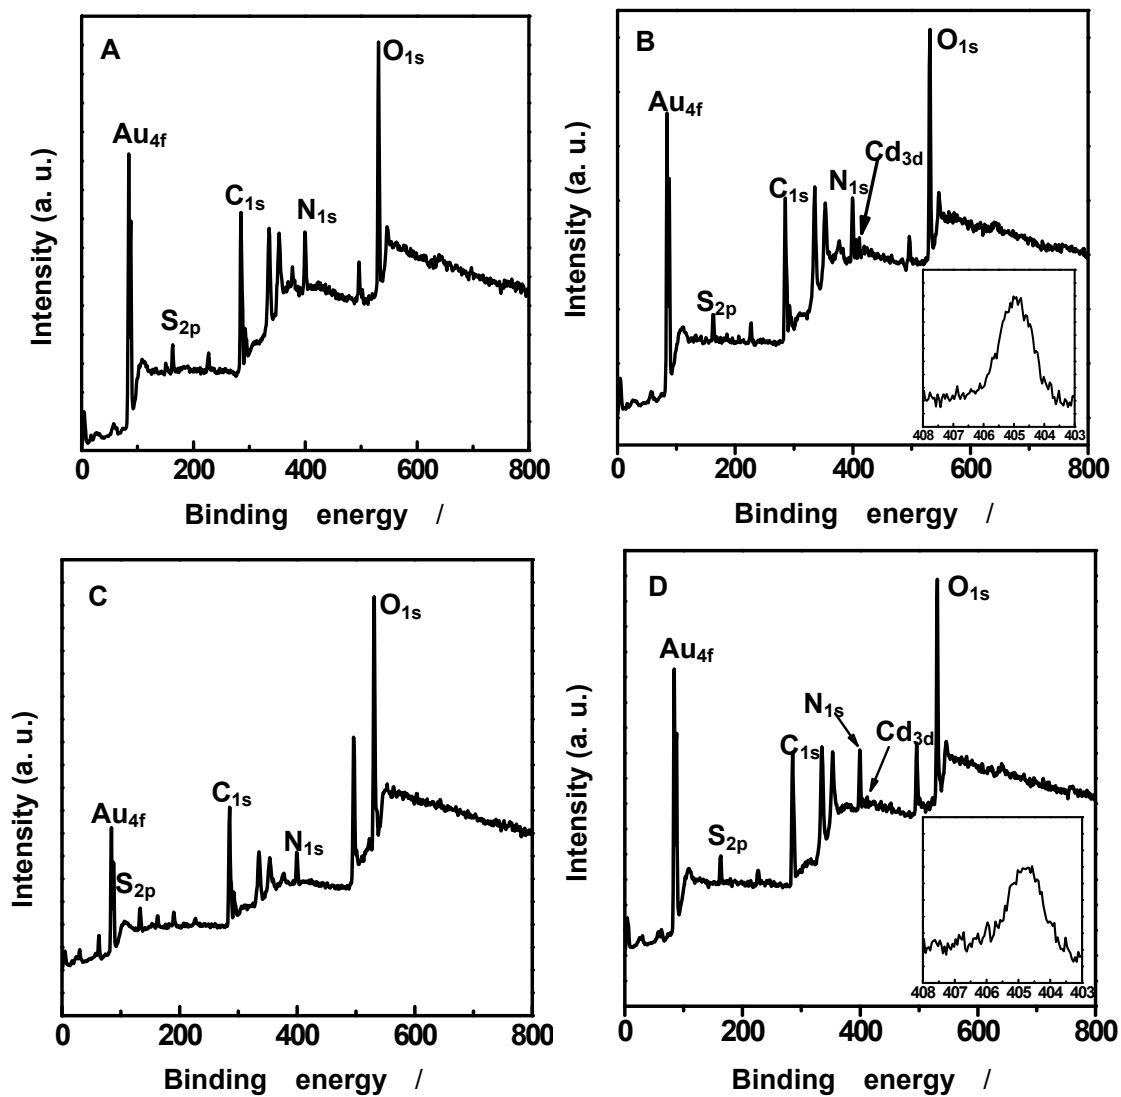

**Figure S9.** Full-scale XPS spectra of GSH-Au NCs at pH 7 (A, B) and 11 (C, D), respectively, in the absence (left panel) and presence (right panel) of  $\text{Cd}^{2+}$ . Inset in B and D: Cd 3d high-resolution XPS spectra.

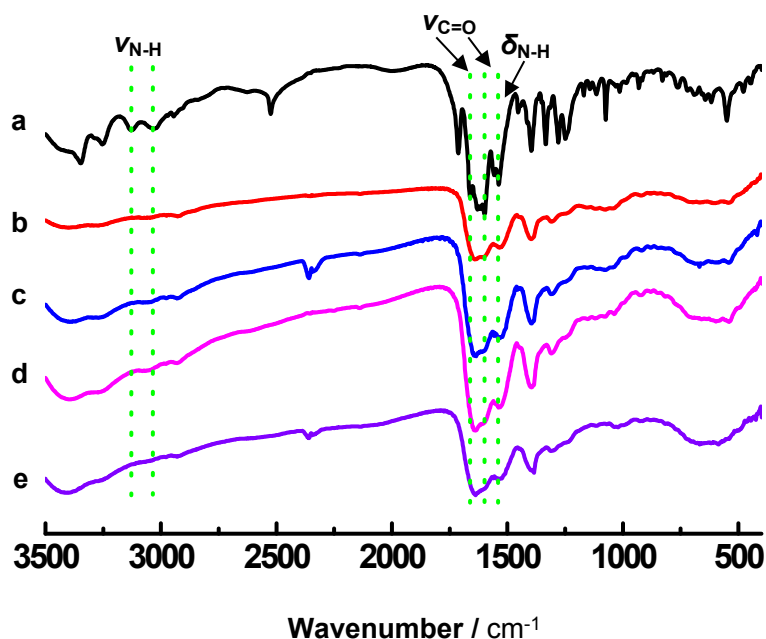

**Figure S10.** FT-IR spectra of (a) GSH, GSH-Au NCs at pH 7 in the absence (b) and presence (d) of Cd<sup>2+</sup>, and at pH 11 in the absence (c) and presence (e) of Cd<sup>2+</sup>, respectively. Y axis is transmittance.

For GSH, peaks at 3126 and 3028, 1660 and 1600, and 1538 cm<sup>-1</sup> were assigned to the N–H (NH<sub>3</sub><sup>+</sup>) stretching band ( $\nu_{\text{N-H}}$ ), the C=O stretching band of the carboxylic group ( $\nu_{\text{C=O}}$ ), and the strong absorption peak of N–H deformation of the amide bond ( $\delta_{\text{N-H}}$ ), respectively.<sup>27,28</sup> Under different pH values (e. g., 7 and 11), GSH has different ionization forms due to the differences of the deprotonation ability of the functional groups mentioned above. For the GSH-Au NCs at pH 7, the peaks of the carboxylic groups shifted to 1643 and 1603 cm<sup>-1</sup>, and the shape became relatively broad. After the addition of Cd<sup>2+</sup>, these peaks shifted slightly, indicating in this case, very weak interaction between GSH and Cd<sup>2+</sup>. For GSH-Au NCs at pH 11, before and after the addition of Cd<sup>2+</sup>, the peaks of the carboxylic groups shifted as those for GSH-Au NCs at pH 7. However, the peak corresponding to the amide bond became very weak and almost disappeared after adding Cd<sup>2+</sup>. The similar change also happened for the N–H (NH<sub>3</sub><sup>+</sup>) stretching band ( $\nu_{\text{N-H}}$ ). These results suggest that GSH could strongly coordinate to Cd<sup>2+</sup> at high pH.

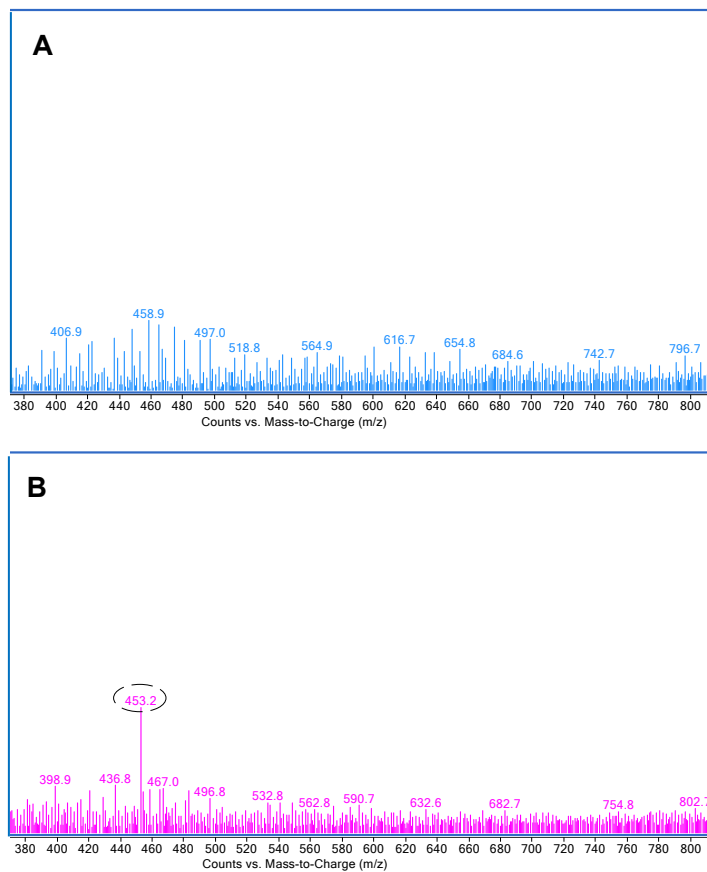

**Figure S11.** ESI-MS data for GSH-Au NCs at pH 11 in the absence (A) and presence (B) of  $\text{Cd}^{2+}$ , respectively.

**Table S1. QYs and Zeta Potentials of GSH-Au NCs at pH 7 and 11 in the Absence and Presence of Cd<sup>2+</sup>**

| Sample                              | QY(%) | Zeta potential (mV) |
|-------------------------------------|-------|---------------------|
| GSH-Au NCs (pH 7)                   | 0.22  | -9.78               |
| GSH-Au NCs (pH 7)+Cd <sup>2+</sup>  | 0.24  | -9.26               |
| GSH-Au NCs (pH 11)                  | 0.15  | -40.90              |
| GSH-Au NCs (pH 11)+Cd <sup>2+</sup> | 0.24  | -32.87              |

**Table S2. Binding Energies Corresponding to the Deconvoluted Peaks of C 1s, O 1s, and N 1s of GSH-Au NCs at pH 11 in the Absence and Presence of Cd<sup>2+</sup>**

| Sample                       | BE <sup>a</sup> C1s (eV) |        |        | BE O1s (eV)         |                     | BE N1s (eV)        |                  |
|------------------------------|--------------------------|--------|--------|---------------------|---------------------|--------------------|------------------|
|                              | C–C                      | C–O    | C=O    | O=C–O* <sup>b</sup> | <sup>c</sup> *O=C–O | CO–NH <sup>d</sup> | <sup>e</sup> N–H |
| GSH-Au NCs                   | 284.74                   | 285.64 | 288.00 | 532.16              | 530.86              | 399.59             | 401.07           |
| GSH-Au NCs +Cd <sup>2+</sup> | 284.63                   | 285.73 | 287.76 | 532.42              | 530.87              | 399.38             | 400.66           |

<sup>a</sup>Binding energy. <sup>b</sup>Hydroxyl O in the carboxylic group. <sup>c</sup>Carbonyl O in the carboxylic group.

<sup>d</sup>Amidic N in the peptide linkage between the cysteinyl and glycyl residuals. <sup>e</sup>Amino N.

**Scheme S1. Proposed Structures of Hg-GSH Complexes at pH 5 (A) and 11 (B)**

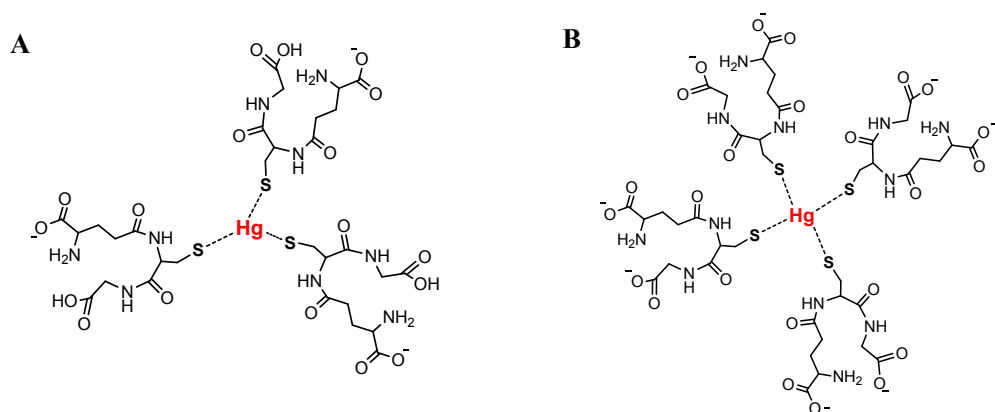

**Scheme S2. Proposed Structures of Cd-GSH Complexes at pH 7 (A) and 11 (B) on Au Surface**

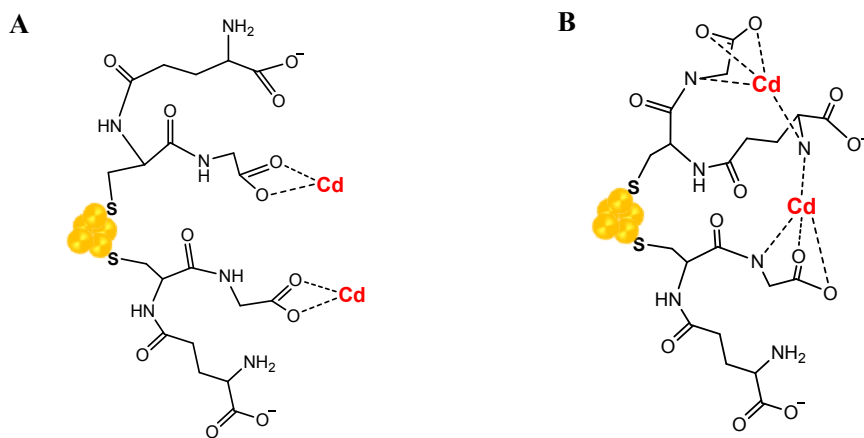

Supplement: c5an01356a1.pdf [file c5an01356a1.pdf]
